# Supplementary material
Source: publisher figshare collection journal article supplement (https://springernature.figshare.com/ndownloader/files/22906340)
Supplement: Supplementary file [file 22906340]

Identity\_\_\_\_\_ herd\_\_\_\_\_ date\_\_\_\_\_

Occlusion\_\_\_\_\_ Supernumerary teeth\_\_\_\_\_ (is drawn) Absence of teeth\_\_\_\_\_ (mark with a ring) Signs of caries(C)\_\_\_\_\_ (mark with \*)Fractures(F)\_\_\_\_\_ (mark FO/FC, missing part is colored)

| Left maxilla   |    |   |   |    |    |   | Right maxilla   |    |    |   |   |    |    |   |     |
|----------------|----|---|---|----|----|---|-----------------|----|----|---|---|----|----|---|-----|
|                |    | F | C | TW | CI | M | PDI             |    |    | F | C | TW | CI | M | PDI |
| i1             | I1 |   |   |    |    |   |                 | i1 | I1 |   |   |    |    |   |     |
| i2             | I2 |   |   |    |    |   |                 | i2 | I2 |   |   |    |    |   |     |
| i3             | I3 |   |   |    |    |   |                 | i3 | I3 |   |   |    |    |   |     |
| c1             | C1 |   |   |    |    |   |                 | c1 | C1 |   |   |    |    |   |     |
|                | P1 |   |   |    |    |   |                 |    | P1 |   |   |    |    |   |     |
| p2             | P2 |   |   |    |    |   |                 | p2 | P2 |   |   |    |    |   |     |
| p3             | P3 |   |   |    |    |   |                 | p3 | P3 |   |   |    |    |   |     |
| p4             | P4 |   |   |    |    |   |                 | p4 | P4 |   |   |    |    |   |     |
|                | M1 |   |   |    |    |   |                 |    | M1 |   |   |    |    |   |     |
|                | M2 |   |   |    |    |   |                 |    | M2 |   |   |    |    |   |     |
|                | M3 |   |   |    |    |   |                 |    | M3 |   |   |    |    |   |     |
| Left mandibula |    |   |   |    |    |   | Right mandibula |    |    |   |   |    |    |   |     |
| i1             | I1 |   |   |    |    |   |                 | i1 | I1 |   |   |    |    |   |     |
| i2             | I2 |   |   |    |    |   |                 | i2 | I2 |   |   |    |    |   |     |
| i3             | I3 |   |   |    |    |   |                 | i3 | I3 |   |   |    |    |   |     |
| c1             | C1 |   |   |    |    |   |                 | c1 | C1 |   |   |    |    |   |     |
|                | P1 |   |   |    |    |   |                 |    | P1 |   |   |    |    |   |     |
| p2             | P2 |   |   |    |    |   |                 | p2 | P2 |   |   |    |    |   |     |
| p3             | P3 |   |   |    |    |   |                 | p3 | P3 |   |   |    |    |   |     |
| p4             | P4 |   |   |    |    |   |                 | p4 | P4 |   |   |    |    |   |     |
|                | M1 |   |   |    |    |   |                 |    | M1 |   |   |    |    |   |     |
|                | M2 |   |   |    |    |   |                 |    | M2 |   |   |    |    |   |     |
|                | M3 |   |   |    |    |   |                 |    | M3 |   |   |    |    |   |     |

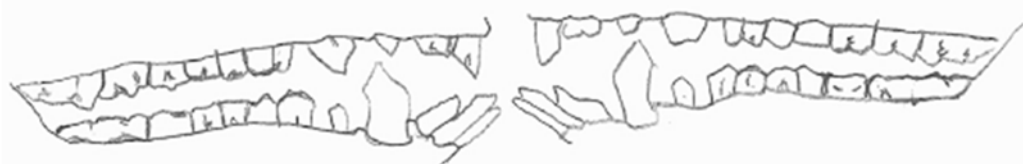

Dental examination chart used in this study. Incisors (I), canines (C), Premolars (P) and molars (M) are numbered in accordance with their appearance in primitive eutherian dentition (lower-case letter indicates deciduous teeth).
